# Supplementary material
Source: publisher figshare collection journal article supplement (https://frontiersin.figshare.com/ndownloader/files/12299801)
Supplement: Supplementary file [file 12299801]

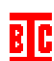

Brookhaven Instruments Corp.  
PALS Zeta Potential Analyzer Ver. 3.52

Date: Feb 2, 2018  
Time: 09:33:24  
Batch: 1

Sample ID **AgNPs-Hellma-CUV-plastica-H (Combined)**

Operator ID **Luca**

Notes **2018-02-02**

Measurement Parameters:

|                      |                               |                     |            |
|----------------------|-------------------------------|---------------------|------------|
| Mean Zeta Potential  | = -37.83 mV                   | Liquid              | = Water    |
| Zeta Potential Model | = Hückel                      | Temperature         | = 25.0 °C  |
| Mean Mobility        | = -1.97 ( $\mu$ /s ) / (V/cm) | Viscosity           | = 0.890 cP |
| pH                   | = 7.40                        | Refractive Index    | = 1.330    |
| Conductance          | = 71 $\mu$ S                  | Dielectric Constant | = 78.54    |
| Concentration        | = 1.00 mg/mL                  | Particle Size       | = 32.0 nm  |

Instrument Parameters:

|                   |             |                |              |
|-------------------|-------------|----------------|--------------|
| Sample Count Rate | = 635 kcps  | Voltage        | = 4.00 volts |
| Ref. Count Rate   | = 3122 kcps | Electric Field | = 10.81 V/cm |
| Wavelength        | = 660.0 nm  | User1          | = 0.00       |
| Field Frequency   | = 2.00 Hz   | User2          | = 0.00       |
| Cycles Per Run    | = 10        |                |              |

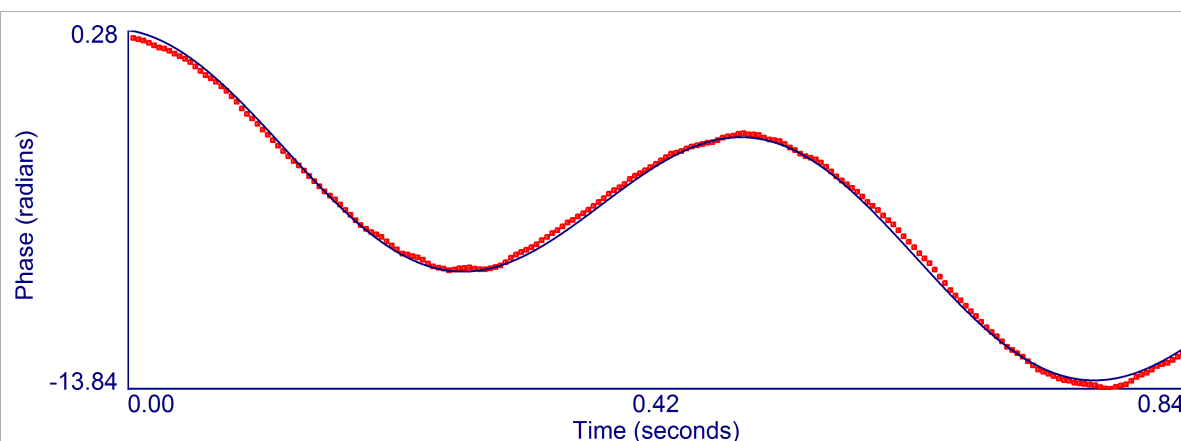

AgNPs-Hellma-CUV-plastica-H (Combined)

| Run        | Mobility | Zeta Potential (mV) | Rel. Residual |
|------------|----------|---------------------|---------------|
| 1          | -1.76    | -33.79              | 0.0155        |
| 2          | -2.02    | -38.79              | 0.0283        |
| 3          | -1.83    | -35.07              | 0.0255        |
| 4          | -2.12    | -40.76              | 0.0289        |
| 5          | -2.06    | -39.61              | 0.0164        |
| 6          | -1.76    | -33.87              | 0.0232        |
| 7          | -1.85    | -35.46              | 0.0353        |
| 8          | -1.87    | -35.81              | 0.0185        |
| 9          | -2.10    | -40.35              | 0.0242        |
| 10         | -1.92    | -36.84              | 0.0263        |
| Mean       | -1.97    | -37.83              | 0.0254        |
| Std. Error | 0.04     | 0.82                | 0.0021        |
| Combined   | -1.96    | -37.70              | 0.0121        |
